# Supplementary figures and images for: Synthesis and biological activity of NOSH-naproxen (AVT-219) and NOSH-sulindac (AVT-18A) as potent anti-inflammatory agents with chemotherapeutic potential
Source: Royal Society of Chemistry journal article supplement (doi:10.1039/c3md00185g), 2013-01-01

### NOSH-naproxen

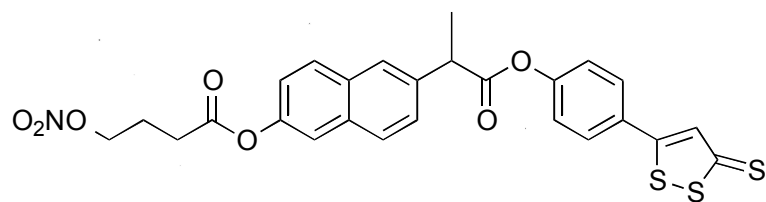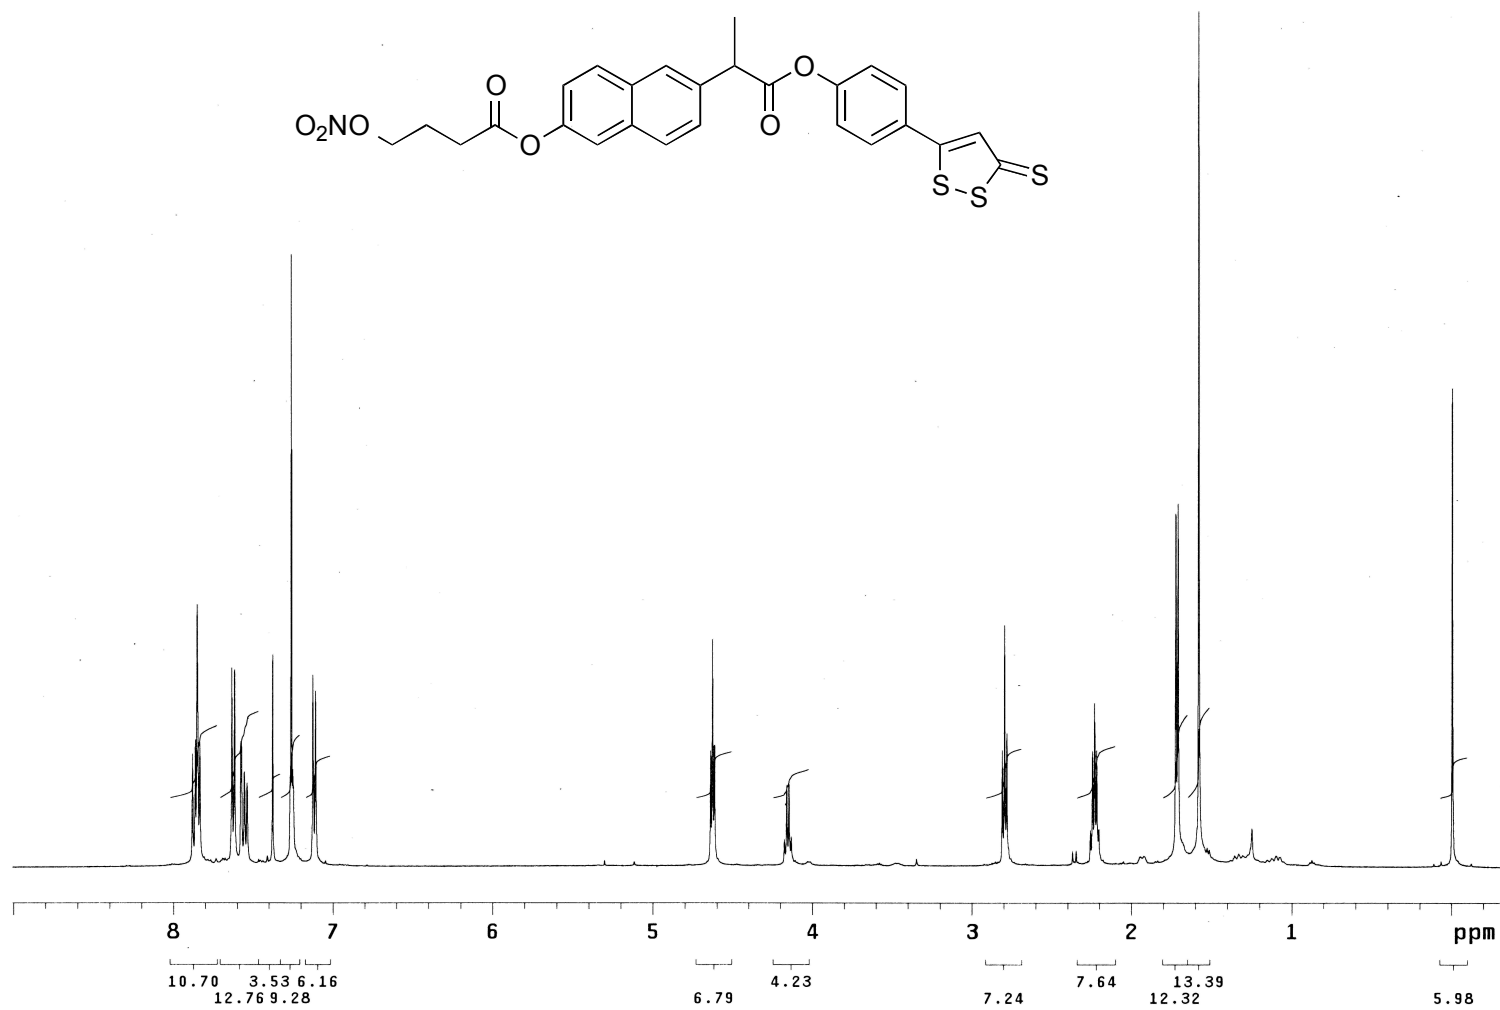

Supplement: c3md00185g.pdf [file c3md00185g.pdf]
